# Supplementary material for: Influence of Criminal Justice Involvement and Psychiatric Diagnoses on Treatment Costs Among Adults With Serious Mental Illness
Source: Atypon-hosted journal article supplement (doi:10.1176/appi.ps.201500134), 2015-05-15
Supplement: appi.ps.201500134.ds001.pdf [file appi.ps.201500134.ds001.pdf]

**Table 1. Ordinary least squares regression models of predictors of total treatment services costs in two years among adults with serious mental illness in CT<sup>a</sup>.**

|                                      | Model #1: CJJ effect |         |            | Model #2: Combinations by CJJ and SUD diagnosis |         |            | Model #3: Combinations by CJJ and primary psychiatric diagnosis |         |            |
|--------------------------------------|----------------------|---------|------------|-------------------------------------------------|---------|------------|-----------------------------------------------------------------|---------|------------|
|                                      | Coeff                | t-value | SE         | Coeff                                           | t-value | SE         | Coeff                                                           | t-value | SE         |
| Intercept                            | -47274.0             | -9.5    | 4980.9 *** | -47700.0                                        | -9.6    | 4997.2 *** | -19666.0                                                        | -3.9    | 4993.3 *** |
| CJJ involvement (CJJ)                | 13611.0              | 7.0     | 1947.3 *** | --                                              | --      | --         |                                                                 |         |            |
| Reference [No CJJ and no SUD]        |                      |         |            |                                                 |         |            |                                                                 |         |            |
| CJJ and no SUD                       |                      |         |            | 19901.0                                         | 7.0     | 2858.3 *** |                                                                 |         |            |
| No CJJ and SUD                       |                      |         |            | 11752.0                                         | 8.5     | 1378.8 *** |                                                                 |         |            |
| CJJ and SUD                          |                      |         |            | 20140.0                                         | 10.8    | 1861.7 *** |                                                                 |         |            |
| Reference [No CJJ and schizophrenia] |                      |         |            |                                                 |         |            |                                                                 |         |            |
| No CJJ and bipolar disorder          |                      |         |            |                                                 |         |            | -24044.0                                                        | -21.3   | 1130.0 *** |
| CJJ and bipolar disorder             |                      |         |            |                                                 |         |            | -20182.0                                                        | -12.4   | 1630.8 *** |
| CJJ and schizophrenia                |                      |         |            |                                                 |         |            | 27926.0                                                         | 7.4     | 3759.3 *** |
| Male                                 | 5363.3               | 5.3     | 1021.4 *** | 5117.6                                          | 5.1     | 1013.5 *** | 5442.4                                                          | 5.3     | 1023.2 *** |
| Reference [White]                    |                      |         |            |                                                 |         |            |                                                                 |         |            |
| Black                                | 984.5                | 0.6     | 1774.4     | 933.2                                           | 0.5     | 1774.1     | -414.0                                                          | -0.2    | 1791.1     |
| Hispanic                             | -7760.9              | -6.0    | 1288.6 *** | -7722.1                                         | -6.0    | 1287.4 *** | -8443.8                                                         | -6.5    | 1309.1 *** |
| Other race                           | -11135.0             | -8.0    | 1384.5 *** | -10923.0                                        | -7.9    | 1382.4 *** | -11872.0                                                        | -8.6    | 1381.3 *** |
| Schizophrenia                        | 30272.0              | 26.8    | 1129.3 *** | 30425.0                                         | 26.8    | 1136.3 *** | --                                                              | --      | --         |
| Substance use disorder (SUD)         | 8287.5               | 6.6     | 1260.1 *** | --                                              | --      | --         | 8013.2                                                          | 6.3     | 1266.2 *** |
| Community tenure                     | 49484.0              | 12.8    | 3856.0 *** | 48432.0                                         | 12.8    | 3798.6 *** | 49003.0                                                         | 12.6    | 3876.5 *** |
| Age                                  | 77.3                 | 1.7     | 46.4       | 89.0                                            | 1.9     | 46.7       | 92.0                                                            | 2.0     | 46.8 *     |

\* Significant at 5% level; \*\* significant at 1% level; \*\*\* significant at 0.1%

<sup>a</sup> Robust standard errors predicted for all models.
